# Supplementary material
Source: PubMed Central journal article supplement (PMC7212307)
Supplement: NIHMS1567840-supplement-Table_S3_primers.pdf [file NIHMS1567840-supplement-Table_S3_primers.pdf]

ME3ddCTPtop /5phos/CTGTCTTTATACACATCTCTGATGGCGGAGGGA/3ddCTP/  
 5NH2MEbottom /5AmC6/TCCCTCGCGCCATCAGAGATGTGTATAAGAGACAG

Bio67F /5Phos/CTGTCTTTATACACATCTCCGAGCCCACGAGAC/iBiodT/CGTCGGCAGCGTCAGATGTGTATAAGAGACAG  
 67bpR /5Phos/CTGTCTTTATACACATCTGACGCTGCCGACGAGTCTCGTGGGCTCGGAGATGTGTATAAGAGACAG

|      |                                                                                        |
|------|----------------------------------------------------------------------------------------|
| N503 | AATGATACGGCGACCACCGAGATCTACAC <u>TATCCTCT</u> <b>TCGTGGCAGCGT</b> CAGATGTGTATAAGAGACAG |
| N504 | AATGATACGGCGACCACCGAGATCTACAC <u>AGAGTAGA</u> <b>TCGTGGCAGCGT</b> CAGATGTGTATAAGAGACAG |
| N501 | AATGATACGGCGACCACCGAGATCTACAC <u>TAGATCGT</u> <b>TCGTGGCAGCGT</b> CAGATGTGTATAAGAGACAG |
| N502 | AATGATACGGCGACCACCGAGATCTACAC CTCTCTAT <b>TCGTGGCAGCGT</b> CAGATGTGTATAAGAGACAG        |
| N701 | CAAGCAGAAGACGGCATAACGAGAT TCGCCTTA <b>GTCTCGTGGGCTCGG</b> AGATGTGTATAAGAGACAG          |
| N702 | CAAGCAGAAGACGGCATAACGAGAT CTAGTACG <b>GTCTCGTGGGCTCGG</b> AGATGTGTATAAGAGACAG          |
| N703 | CAAGCAGAAGACGGCATAACGAGAT TTCTGCCT <b>GTCTCGTGGGCTCGG</b> AGATGTGTATAAGAGACAG          |
| N706 | CAAGCAGAAGACGGCATAACGAGAT CATGCCTA <b>GTCTCGTGGGCTCGG</b> AGATGTGTATAAGAGACAG          |
| N709 | CAAGCAGAAGACGGCATAACGAGAT AGCGTAGC <b>GTCTCGTGGGCTCGG</b> AGATGTGTATAAGAGACAG          |
| N711 | CAAGCAGAAGACGGCATAACGAGAT TGCCTCTT <b>GTCTCGTGGGCTCGG</b> AGATGTGTATAAGAGACAG          |

|                   |                                                  |
|-------------------|--------------------------------------------------|
| IL2ra-1-Nla-DpnII | /5Biosg/GAGCAGTCCCCACATCAGCAGGTATGAATCCATCTTCCTG |
| IL2ra-2-Nla-DpnII | /5Biosg/CCTGGGCTCCTGAAAGTGCATTGTCAATTTATAAGGTGTT |
| IL2ra-3-Nla-DpnII | /5Biosg/GATGCCCATCAGCCTTCCCGGAATTC               |
| IL2ra-4-Nla-DpnII | /5Biosg/GAAATGGTTGAGTGTGTTTTGCTCCCTGGAA          |
| IL2ra-5-Nla-DpnII | /5Biosg/ACCCTTGGGACCAGCCGGGGCAGTGAAGCGGAGG       |
| IL2ra-6-DpnII     | /5Biosg/CAGTCTCTATCGGAGTCAGGAGTTGCTCTCT          |
| IL2ra-7-Nla-DpnII | /5Biosg/CAAATAATGGAGAAGGATGCGGCGAACTGAAGG        |

|           |                                         |
|-----------|-----------------------------------------|
| IL2-1-Nla | /5Biosg/AACCCCAAGACTGACTGAATGGATGTAGGT  |
| IL2-2-Nla | /5Biosg/GGGGGTGGGGATACAAAAGTAACTCAGA    |
| IL2-3-Nla | /5Biosg/TGTGGTGGACAAGAGCAAGAGTAAACAG    |
| IL2-4-Nla | /5Biosg/ATGCTTATTGAGCTTGAGGTAAGTTAACGCT |

|                 |                                                 |
|-----------------|-------------------------------------------------|
| IL2-5-Nla-DpnII | /5Biosg/CTTAAATGTGAGCATCCTGGTGAGTTTGGG          |
| IL2-6-DpnII     | /5Biosg/CCATTCAAATCATCTGTAAATCCAGCAGTAAATGCTCCA |

|                 |                                    |
|-----------------|------------------------------------|
| pMENTS          | 5Phos/CTGTCTCTTATACACATCT          |
| i5Top primer    | TCGTCGGCAGCGTCAGATGTGTATAAGAGACAG  |
| i7Bottom primer | GTCTCGTGGGCTCGGAGATGTGTATAAGAGACAG |

|                     |                      |
|---------------------|----------------------|
| sg1 target sequence | AGTCCCGAAAATTTAACCGC |
| sg2 target sequence | GGAGCTATGTCTAAACTATC |
| sg3 target sequence | CTGCATGCGTGACATCTCGC |
| sgControl sequence  | CTTGCCAGTCCCCGGAAC   |
